# Supplementary material
Source: Springer Nature journal article supplement (https://www.springermedizin.de/resource/supplementary/12906_2007_196_MOESM1_ESM.pdf/9524250)

a

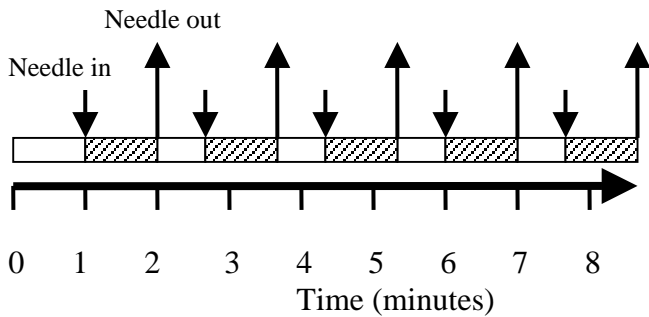

b

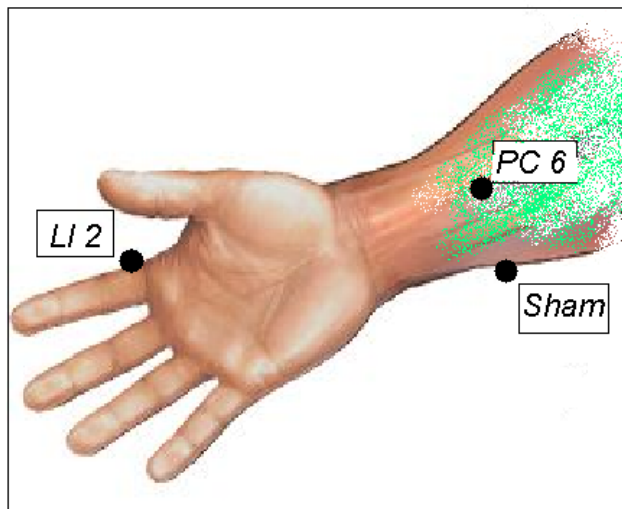

Supplement: MOESM1 [file 9524250]
